# Supplementary material for: Polypyrrole modified porous poly(ether sulfone) membranes with high performance for vanadium flow batteries
Source: Royal Society of Chemistry journal article supplement (doi:10.1039/c6ta05655e), 2016-01-01
Supplement: c6ta05655e1.pdf [file c6ta05655e1.pdf]

Polypyrrole modified porous poly (ether sulfone) membranes with high performance for vanadium flow batteries

Zhizhang Yuan<sup>a,c</sup>, Qing Dai<sup>d</sup>, Yuyue Zhao<sup>a,c</sup>, Wenjing Lu<sup>a,c</sup>, Xianfeng Li<sup>a,b\*</sup>, Huamin Zhang<sup>a,b\*</sup>

<sup>a</sup> Division of Energy Storage, Dalian Institute of Chemical Physics, Chinese Academy of Sciences, 457 Zhongshan Road, Dalian 116023 (P. R. China), Email: [lixianfeng@dicp.ac.cn](mailto:lixianfeng@dicp.ac.cn), [zhanghm@dicp.ac.cn](mailto:zhanghm@dicp.ac.cn).

<sup>b</sup> Collaborative Innovation Center of Chemistry for Energy Materials (iChEM), Dalian 116023 (P. R. China).

<sup>c</sup> University of Chinese Academy of Sciences, Beijing 100039 (P. R. China).

<sup>d</sup> Faculty of Chemical, Environmental and Biological Science and Technology, Dalian University of Technology.

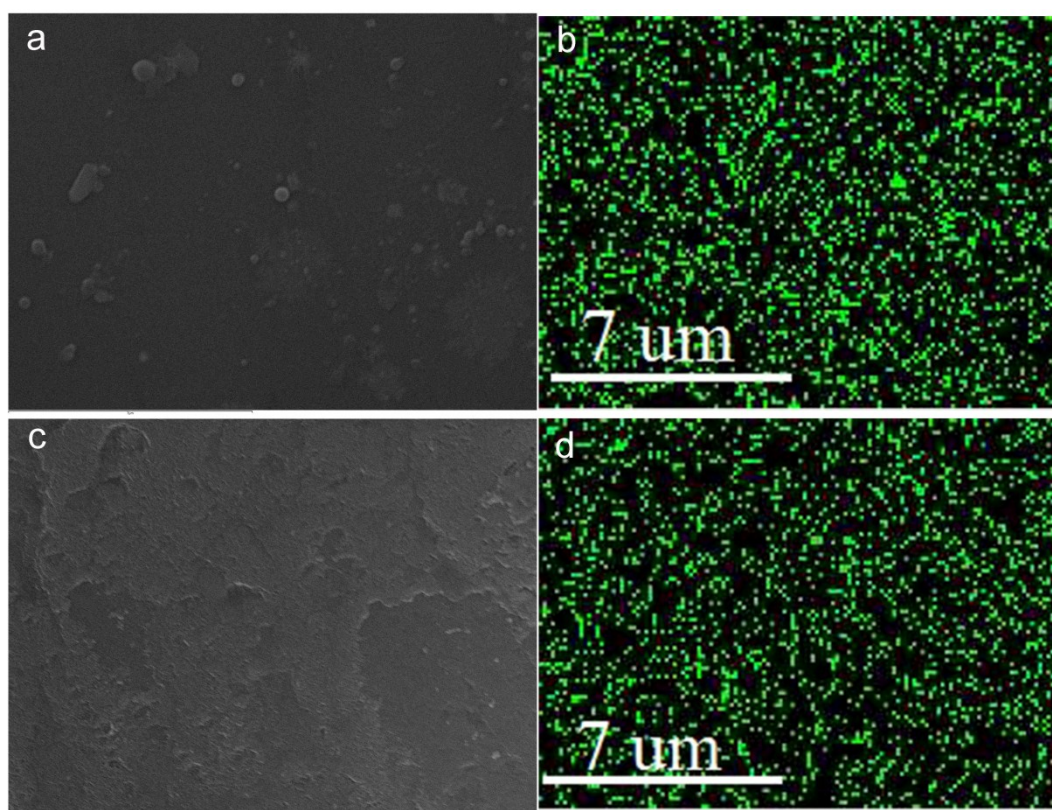

**Fig. S1** Surface morphology of PPY/PES porous membranes (a) before and (c) after the cycling test; the corresponding EDS mapping of N distribution (b) before and (d) after the cycling test, confirming the uniform distribution and stability of the PPY in the membrane.

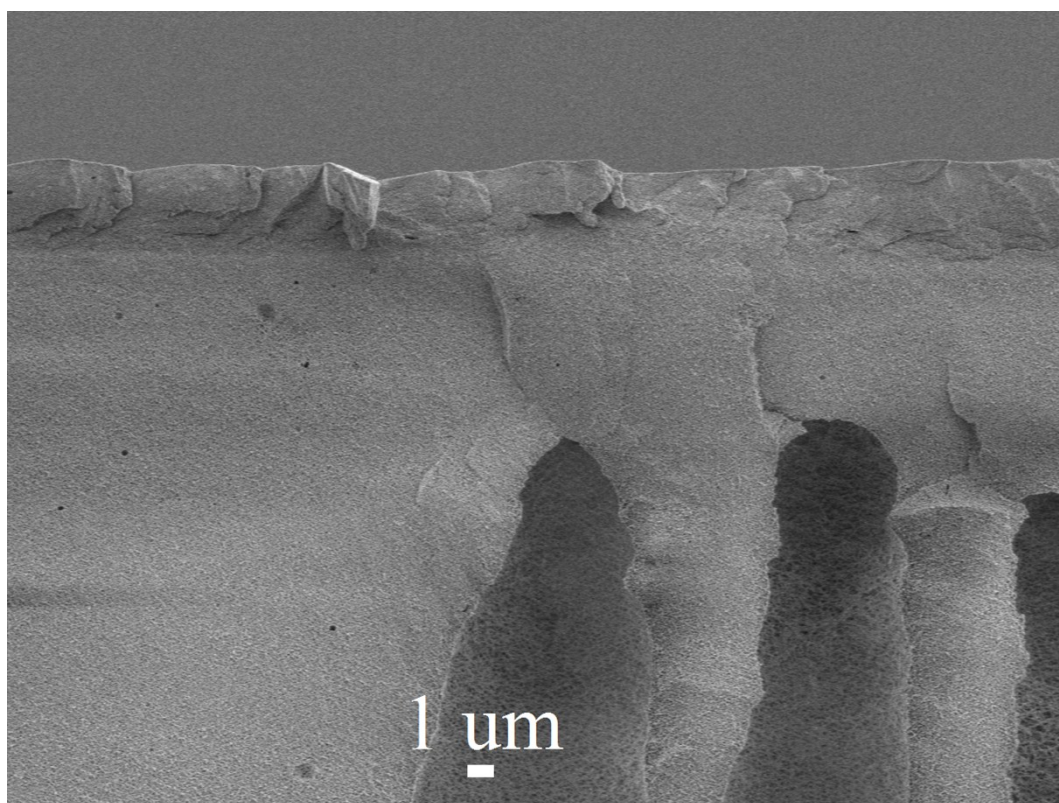

**Fig. S2** Magnified cross section morphology of the substrate.

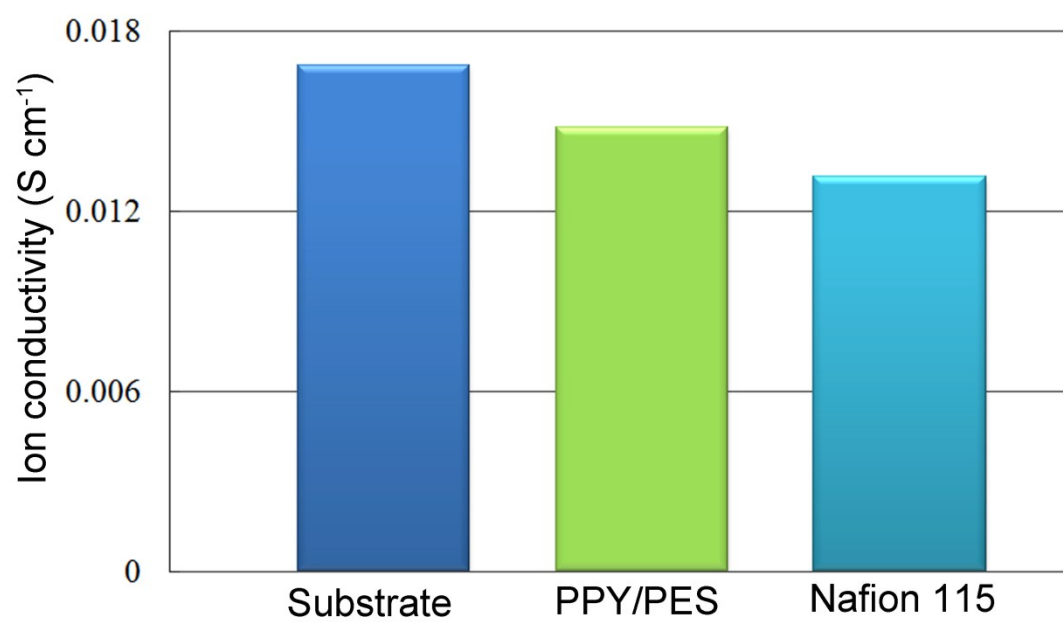

**Fig. S3** Ion conductivity of the substrate, PPY/PES and Nafion 115 membranes.

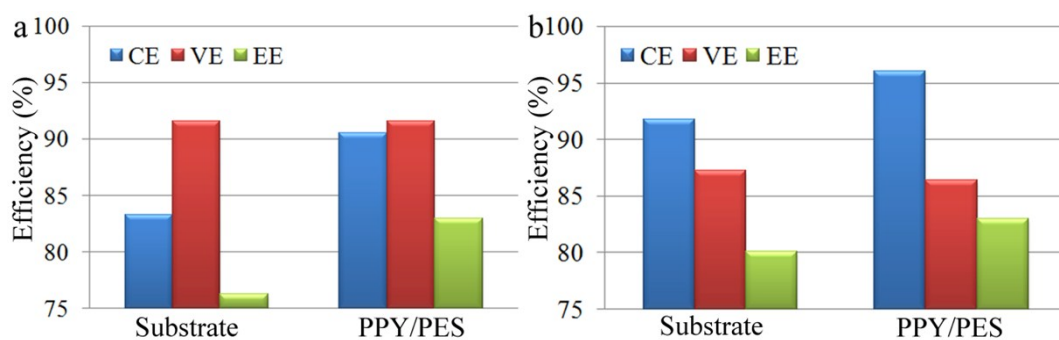

**Fig. S4** The efficiency of a vanadium flow battery installed with substrate and PPY/PES with different membrane thickness (a:  $85 \pm 5 \mu\text{m}$ , b:  $140 \pm 5 \mu\text{m}$ ) at  $80 \text{ mA cm}^{-2}$ .
